# Supplementary material for: The Concept of Child-Centred Care in Healthcare: A Scoping Review
Source: MDPI journal article supplement (doi:10.3390/pediatric16010012), 2024-02-01
Supplement: s1 [file s1]

## Search Terms and Strategies

### 1. CINAHL

| <a href="#">Search ID#</a> ▾ | Search Terms                                                                                                                                                                 |
|------------------------------|------------------------------------------------------------------------------------------------------------------------------------------------------------------------------|
| S10                          |  S6 AND S7                                                                                  |
| S9                           |  S6 AND S7                                                                                  |
| S8                           |  S6 AND S7                                                                                  |
| S7                           |  S3 OR S4 OR S5                                                                            |
| S6                           |  S1 OR S2                                                                                 |
| S5                           |  MH child* cent*ed care OR child health services                                          |
| S4                           |  MH child* cent*ed care OR family cent*ed care                                            |
| S3                           |  MM patient autonomy OR decision making, family                                           |
| S2                           |  AB child* cent*ed OR child cent*ed care OR child health care OR child* decision-making   |
| S1                           |  TI child* cent*ed OR child* cent*ed care OR child* health care OR child* decision-making |

## 2. Web of Science

|   |                                                                                                         |
|---|---------------------------------------------------------------------------------------------------------|
| 8 | #5 AND #6 and <b>English</b> (Languages)                                                                |
| 7 | #5 AND #6                                                                                               |
| 6 | #3 AND #4                                                                                               |
| 5 | #1 AND #2                                                                                               |
| 4 | <b>child health services</b> (Abstract)                                                                 |
| 3 | <b>patient autonomy OR decision making, family</b> (Abstract)                                           |
| 2 | <b>child* cent*ed OR child* cent*ed care OR child* health care OR child* decision-making</b> (Abstract) |
| 1 | <b>child* cent*ed OR child* cent*ed care OR child* health care OR child* decision-making</b> (Title)    |

### 3. Medline

|    |                                                                                                                                                                              |
|----|------------------------------------------------------------------------------------------------------------------------------------------------------------------------------|
| S8 |  S6 AND S7                                                                                  |
| S7 |  S3 OR S4 OR S5                                                                             |
| S6 |  S1 OR S2                                                                                   |
| S5 |  MH child* cent*ed care OR child health services                                            |
| S4 |  MH child* cent*ed care OR family cent*ed care                                              |
| S3 |  MM patient autonomy OR decision making, family                                             |
| S2 |  AB child* cent*ed OR child cent*ed care OR child health care OR child* decision-making   |
| S1 |  TI child* cent*ed OR child* cent*ed care OR child* health care OR child* decision-making |
